# Supplementary material for: Parent Perspectives on the Usability and Accessibility of the Cdc Milestone Checklist and Asq-3 Questionnaire in Monitoring Early Developmental Delays
Source: Research Square preprint supplement (doi:10.21203/rs.3.rs-7264197/v1), 2025-09-22
Supplement: Supplementary file 1 [file 65e96b1147ba5c8b41ccb213.docx]

**Supplementary Material**

Table 6: Initial quantitative (Two-independent groups)- Mann-Whitney U test results

| Sub Categories | Reading skill | Understanding Ability | Content Correlation | Level of Participation | Curiosity of Participation | Familiarity with questions | Duration of Participation |
| --- | --- | --- | --- | --- | --- | --- | --- |
| Z-value | -0.105 | -1.325 | -1.872 | -0.978 | -0.742 | -1.115 | -0.921 |
| p-value | 0.916 | 0.185 | 0.061 | 0.328 | 0.458 | 0.265 | 0.327 |

p<0.005**,p<0.05*

Bar Graph 7: Level of participation of Preterm and full-term parents


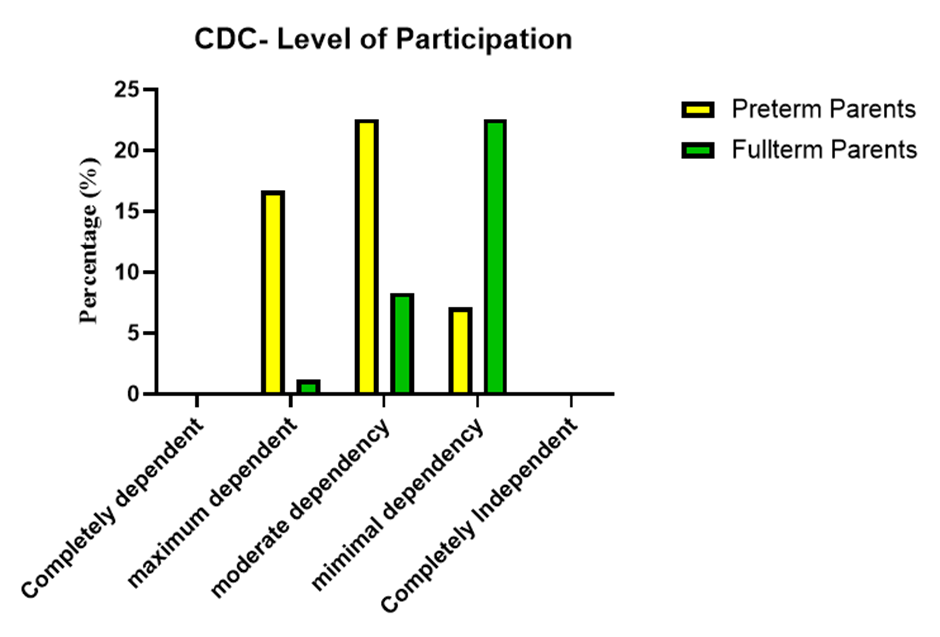


Bar graph 8: Curiosity of Participation by Preterm and Full-term parents


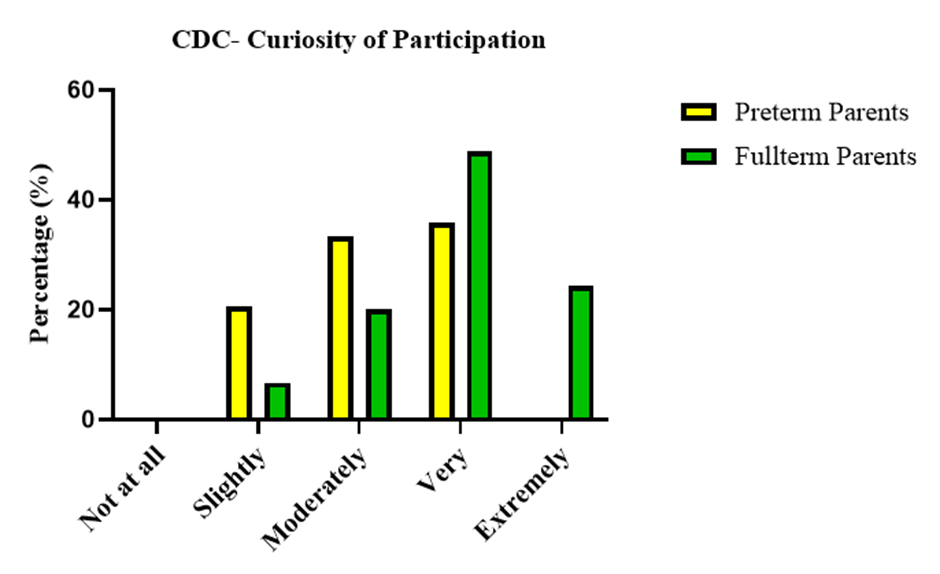


Bar graph 9: ASQ-3 Understanding Ability of Preterm and Full-term Parents


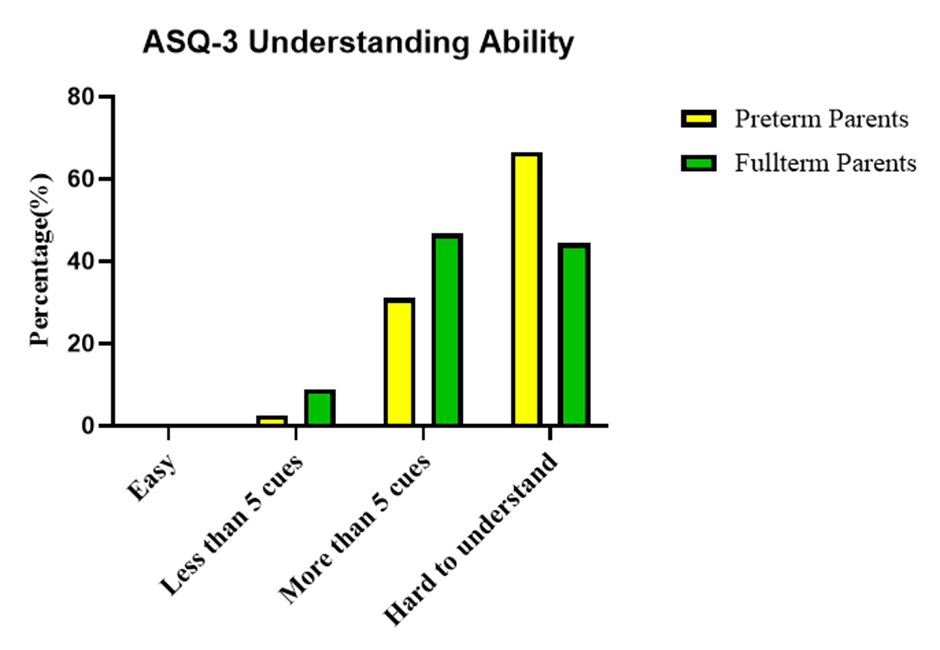


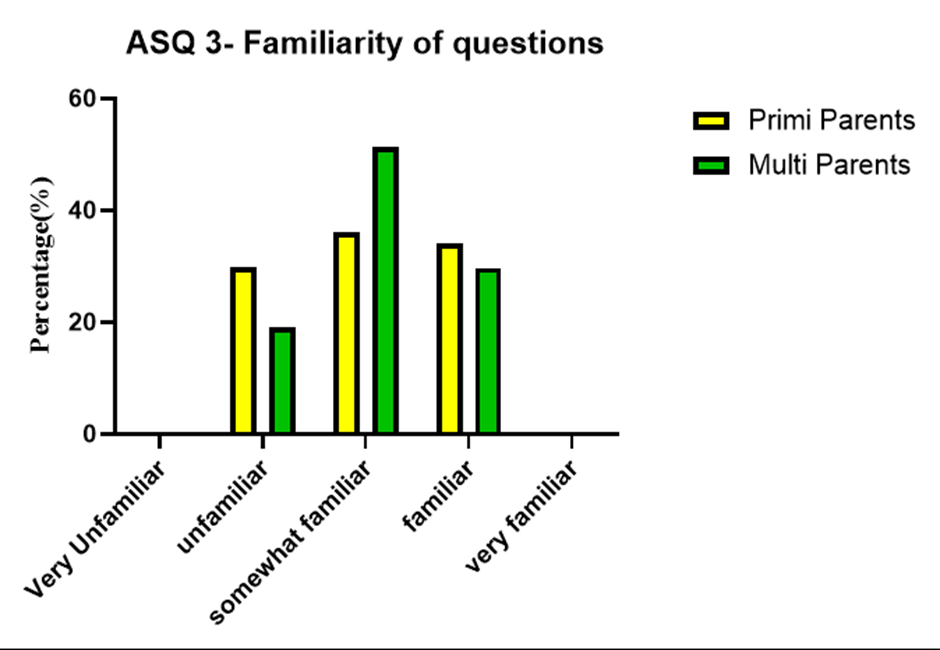
Bar Graph 10: ASQ-3 Familiarity of questions by Primi and Multi Gravida parents
