# Supplementary material for: Parent Perspectives on the Usability and Accessibility of the Cdc Milestone Checklist and Asq-3 Questionnaire in Monitoring Early Developmental Delays
Source: Research Square preprint supplement (doi:10.21203/rs.3.rs-7264197/v1), 2025-09-22

###
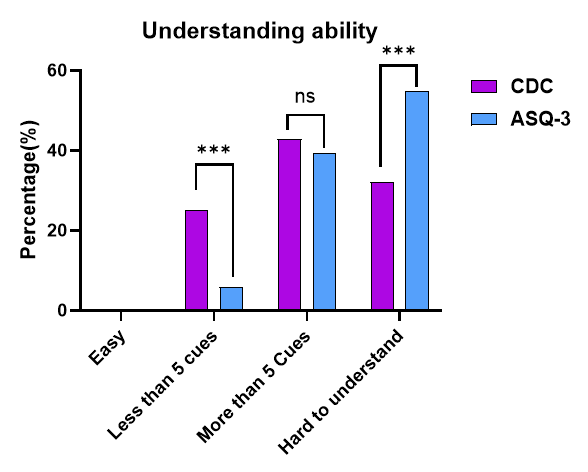
**Bar Graph 1: Understanding Ability**

###
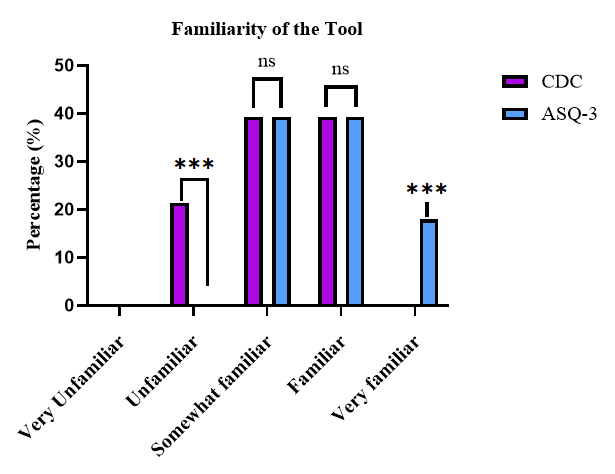
**Bar Graph 2: Familiarity of Screening Tool Questions**


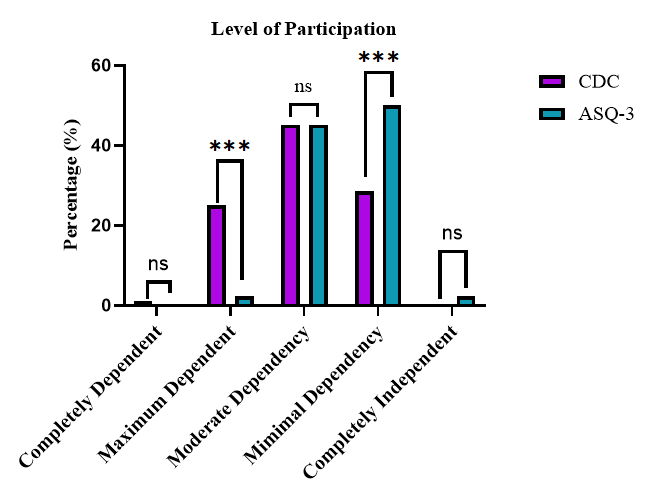
**Bar Graph 3: Comparison of parental level of Participation**

###
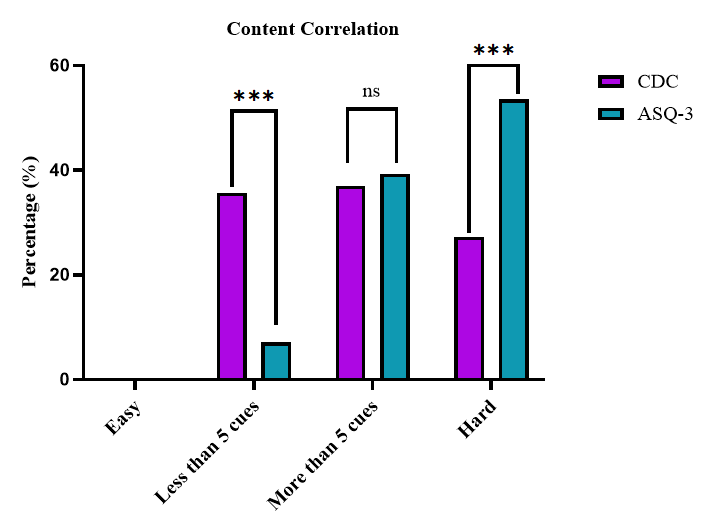
**Bar Graph 4: Comparison of Content Correlation**

### **Bar Graph 5: Comparison of Curiosity of Participation**

###
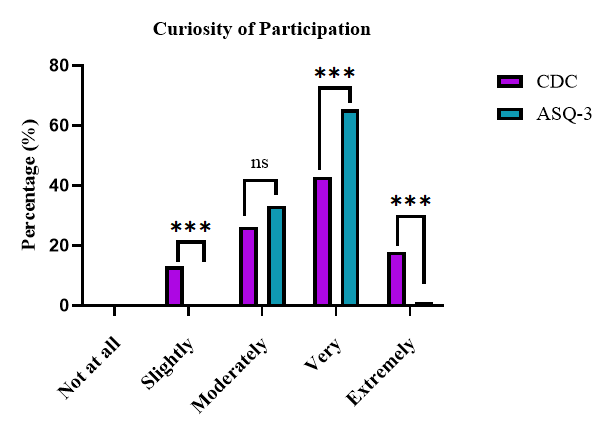


### **Bar Graph 6: Comparison of Duration of Participation**


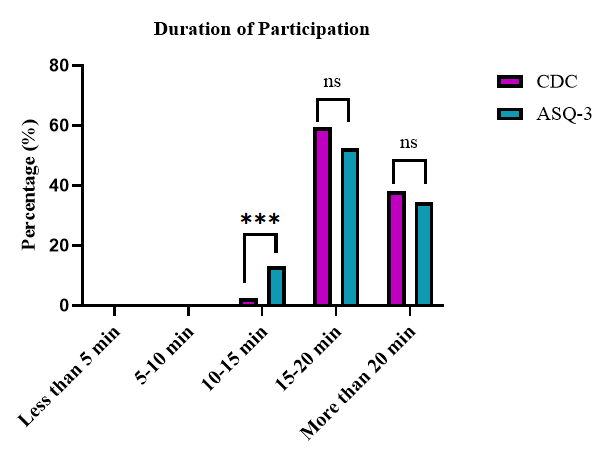

Supplement: Supplementary file 2 [file cc703df555bb704a04291e10.docx]
